# Supplementary material
Source: ML conference proceedings conference paper supplement (https://openreview.net/forum?id=LuvLA57AC-)
Supplement: supplementary_material [file attachment]

# DISCO: Adversarial Defense with Local Implicit Functions

Anonymous Author(s)

Affiliation

Address

email

## 1 A Compare to SOTA in RobustBench

2 In this section, the quantitative result of the baselines in RobustBench [14] are listed. Table A, C and  
 3 D correspond to Fig.6(a), (b) and (c) of the main paper, respectively. Table B shows the baselines  
 4 under Autoattack with  $\epsilon_2 = 0.5$ . The index in each table is associated to the index of Fig.6 in the  
 5 main paper. The baselines in each table are categorized into No defense (first block), Adversarially  
 6 trained defense in RobustBench (second block), Transformation based defense (third block) and  
 7 DISCO (last block). The results of adversarially trained baselines are copied from RobustBench,  
 8 while the results of transformation based defense are conducted by ourselves. For STL [60], different  
 9 sparse constraints  $\lambda$  from the publicly available STL github<sup>1</sup> are used. DISCO is also combined with  
 10 various classifiers for evaluation. More discussion can be found in Sec. 4.1 of the paper.

| ID | Method                              | Standard Acc. | Robust Acc.      | Avg. Acc. | Model       | ID | Method                             | Standard Acc. | Robust Acc. | Avg. Acc. | Model       |
|----|-------------------------------------|---------------|------------------|-----------|-------------|----|------------------------------------|---------------|-------------|-----------|-------------|
| 0  | No Defense                          | 94.78         | 0                | 47.39     | WRN28-10    | 1  | Rebuffi et al. [48]                | 92.23         | 66.58       | 79.41     | WRN70-16    |
| 1  | Rebuffi et al. [48]                 | 92.23         | 66.58            | 79.41     | WRN70-16    | 2  | Gowal et al. [25]                  | 88.74         | 66.11       | 77.43     | WRN70-16    |
| 3  | Gowal et al. [24]                   | 91.1          | 63.88            | 78.49     | WRN70-16    | 4  | Rebuffi et al. [48]                | 88.5          | 64.64       | 76.57     | WRN106-16   |
| 5  | Rebuffi et al. [48]                 | 88.54         | 64.25            | 76.4      | WRN70-16    | 6  | Kang et al. [34]                   | 93.73         | 71.28       | 82.51     | WRN70-16    |
| 7  | Gowal et al. [25]                   | 87.5          | 63.44            | 75.47     | WRN28-10    | 8  | Pang et al. [41]                   | 89.01         | 63.35       | 76.18     | WRN70-16    |
| 9  | Rade et al. [47]                    | 91.47         | 62.83            | 77.15     | WRN34-10    | 10 | Schwag et al. [53]                 | 87.3          | 62.79       | 75.05     | ResNest152  |
| 11 | Gowal et al. [24]                   | 89.48         | 62.8             | 76.14     | WRN28-10    | 12 | Huang et al. [27]                  | 91.23         | 62.54       | 76.89     | WRN34-R     |
| 13 | Huang et al. [27]                   | 90.56         | 61.56            | 76.06     | WRN34-R     | 14 | Dai et al. [18]                    | 87.02         | 61.55       | 74.29     | WRN28-10    |
| 15 | Pang et al. [41]                    | 88.61         | 61.04            | 74.83     | WRN28-10    | 16 | Rade et al. [47]                   | 88.16         | 60.97       | 74.57     | WRN28-10    |
| 17 | Rebuffi et al. [48]                 | 87.33         | 60.75            | 74.04     | WRN28-10    | 18 | Wu et al. [66]                     | 87.67         | 60.65       | 74.16     | WRN34-15    |
| 19 | Sridhar et al. [59]                 | 86.53         | 60.41            | 73.47     | WRN34-15    | 20 | Schwag et al. [54]                 | 86.68         | 60.27       | 73.48     | WRN34-10    |
| 21 | Wu et al. [67]                      | 88.25         | 60.04            | 74.15     | WRN28-10    | 22 | Schwag et al. [54]                 | 89.46         | 59.66       | 74.56     | WRN28-10    |
| 23 | Zhang et al. [77]                   | 89.36         | 59.64            | 74.5      | WRN28-10    | 24 | Yair et al. [8]                    | 89.69         | 59.53       | 74.61     | WRN28-10    |
| 25 | Gowal et al. [25]                   | 87.35         | 58.63            | 72.99     | PreActRes18 | 26 | Addepalli et al. [11]              | 85.32         | 58.04       | 71.68     | WRN34-10    |
| 27 | Chen et al. [10]                    | 86.03         | 57.71            | 71.87     | WRN34-20    | 28 | Rade et al. [47]                   | 89.02         | 57.67       | 73.35     | PreActRes18 |
| 29 | Gowal et al. [24]                   | 85.29         | 57.2             | 71.25     | WRN70-16    | 30 | Schwag et al. [55]                 | 88.98         | 57.14       | 73.06     | WRN28-10    |
| 31 | Rade et al. [47]                    | 86.86         | 57.09            | 71.98     | PreActRes18 | 32 | Chen et al. [10]                   | 85.21         | 56.94       | 71.08     | WRN34-10    |
| 33 | Gowal et al. [24]                   | 85.64         | 56.86            | 71.25     | WRN34-20    | 34 | Rebuffi et al. [48]                | 83.53         | 56.66       | 70.1      | PreActRes18 |
| 35 | Wang et al. [63]                    | 87.5          | 56.29            | 71.9      | WRN28-10    | 36 | Wu et al. [67]                     | 85.36         | 56.17       | 70.77     | WRN34-10    |
| 37 | Alayrac et al. [3]                  | 86.46         | 56.03            | 71.25     | WRN28-10    | 38 | Schwag et al. [54]                 | 84.59         | 55.54       | 70.07     | Res18       |
| 39 | Dan et al. [26]                     | 87.11         | 54.92            | 71.02     | WRN28-10    | 40 | Pang et al. [43]                   | 86.43         | 54.39       | 70.41     | WRN34-20    |
| 41 | Pang et al. [44]                    | 85.14         | 53.74            | 69.44     | WRN34-20    | 42 | Cui et al. [17]                    | 88.7          | 53.57       | 71.14     | WRN34-20    |
| 43 | Zhang et al. [76]                   | 84.52         | 53.51            | 69.02     | WRN34-10    | 44 | Rice et al. [49]                   | 85.34         | 53.42       | 69.38     | WRN34-20    |
| 45 | Huang et al. [28]                   | 83.48         | 53.34            | 68.41     | WRN34-10    | 46 | Zhang et al. [74]                  | 84.92         | 53.08       | 69        | WRN34-10    |
| 47 | Cui et al. [16]                     | 88.22         | 52.86            | 70.54     | WRN34-10    | 48 | Qin et al. [46]                    | 86.28         | 52.84       | 69.56     | WRN40-8     |
| 49 | Chen et al. [12]                    | 86.04         | 51.56            | 68.8      | Res50       | 50 | Chen et al. [11]                   | 85.32         | 51.12       | 68.22     | WRN34-10    |
| 51 | Addepalli et al. [2]                | 80.24         | 51.06            | 65.65     | Res18       | 52 | Chawin et al. [58]                 | 86.84         | 50.72       | 68.78     | WRN34-10    |
| 53 | Engstrom et al. [22]                | 87.03         | 49.25            | 68.14     | Res50       | 54 | Sinha et al. [57]                  | 87.8          | 49.12       | 68.46     | WRN34-10    |
| 55 | Mao et al. [38]                     | 86.21         | 47.41            | 66.81     | WRN34-10    | 56 | Zhang et al. [71]                  | 87.2          | 44.83       | 66.02     | WRN34-10    |
| 57 | Madry et al. [36]                   | 87.14         | 44.04            | 65.59     | WRN34-10    | 58 | Maksym et al. [4]                  | 79.84         | 43.93       | 61.89     | PreActRes18 |
| 59 | Pang et al. [42]                    | 80.89         | 43.48            | 62.19     | Res32       | 60 | Wong et al. [64]                   | 83.34         | 43.21       | 63.28     | PreActRes18 |
| 61 | Shafahi et al. [56]                 | 86.11         | 41.47            | 63.79     | WRN34-10    | 62 | Ding et al. [19]                   | 84.36         | 41.44       | 62.9      | WRN28-4     |
| 63 | Souvik et al. [33]                  | 87.32         | 40.41            | 63.87     | Res18       | 64 | Matan et al. [6]                   | 81.3          | 40.22       | 60.76     | Res18       |
| 65 | Moosavi-Dezfooli et al. [39]        | 83.11         | 38.5             | 60.81     | Res18       | 66 | Zhang et al. [72]                  | 89.98         | 36.64       | 63.31     | WRN28-10    |
| 67 | Zhang et al. [73]                   | 90.25         | 38.45            | 63.35     | WRN28-10    | 68 | Jang et al. [29]                   | 78.91         | 34.95       | 56.93     | Res20       |
| 69 | Kim et al. [32]                     | 91.51         | 34.22            | 62.87     | WRN34-10    | 70 | Zhang et al. [75]                  | 44.73         | 32.64       | 38.69     | 5 layer CNN |
| 71 | Wang et al. [62]                    | 92.8          | 29.35            | 61.08     | WRN28-10    | 72 | Xiao et al. [68]                   | 79.28         | 18.5        | 48.89     | DenseNet121 |
| 73 | Jin et al. [30]                     | 90.84         | 1.35             | 46.1      | Res18       | 74 | Aamir et al. [40]                  | 89.16         | 0.28        | 44.72     | Res110      |
| 75 | Chan et al. [9]                     | 93.79         | 0.26             | 47.03     | WRN34-10    |    |                                    |               |             |           |             |
| 76 | Bit Reduction [70]                  | 92.66         | 1.04             | 46.85     | WRN28-10    | 77 | Jpeg [21]                          | 83.9          | 50.73       | 67.32     | WRN28-10    |
| 78 | Input Rand. [69]                    | 94.3          | 8.59             | 51.45     | WRN28-10    | 79 | LIIF [13]                          | 94.85         | 0.22        | 47.54     | WRN28-10    |
| 80 | AutoEncoder                         | 76.54         | 67.41            | 71.98     | WRN28-10    | 81 | STL [60] (k=64 s=8 $\lambda=0.1$ ) | 90.65         | 57.28       | 73.97     | WRN28-10    |
| 82 | STL [60] (k=64 s=8 $\lambda=0.15$ ) | 86.77         | 66.94            | 76.86     | WRN28-10    | 83 | STL [60] (k=64 s=8 $\lambda=0.2$ ) | 82.22         | 67.92       | 75.07     | WRN28-10    |
| 84 | Median Filter                       | 79.67         | 42.49            | 61.08     | WRN28-10    |    |                                    |               |             |           |             |
| 85 | DISCO                               | 89.26         | 85.56 $\pm$ 0.02 | 87.41     | WRN28-10    |    |                                    |               |             |           |             |

Table A: Cifar10 baselines and DISCO under Autoattack ( $\epsilon_\infty = 8/255$ ). This table corresponds to Fig. 6(a) in the main paper.

<sup>1</sup>[https://github.com/GitBoSun/AdvDefense\\_CSC](https://github.com/GitBoSun/AdvDefense_CSC)

| ID | Method                              | Standard Acc. | Robust Acc.      | Avg. Acc. | Model       | ID | Method                             | Standard Acc. | Robust Acc. | Avg. Acc. | Model       |
|----|-------------------------------------|---------------|------------------|-----------|-------------|----|------------------------------------|---------------|-------------|-----------|-------------|
| 0  | No Defense                          | 94.78         | 0                | 47.39     | WRN28-10    |    |                                    |               |             |           |             |
| 1  | Rebuffi et al. [48]                 | 95.74         | 82.32            | 89.03     | WRN70-16    | 2  | Gowal et al. [24]                  | 94.74         | 80.53       | 87.64     | WRN70-16    |
| 3  | Rebuffi et al. [48]                 | 92.41         | 80.42            | 86.42     | WRN70-16    | 4  | Rebuffi et al. [48]                | 91.79         | 78.8        | 85.30     | WRN28-10    |
| 5  | Augustin et al. [7]                 | 93.96         | 78.79            | 86.38     | WRN34-10    | 6  | Schwag et al. [53]                 | 90.93         | 77.24       | 84.09     | WRN34-10    |
| 7  | Augustin et al. [7]                 | 92.23         | 76.25            | 84.24     | WRN34-10    | 8  | Rade et al. [47]                   | 90.57         | 76.15       | 83.36     | PreActRes18 |
| 9  | Rebuffi et al. [48]                 | 90.33         | 75.86            | 83.10     | PreActRes18 | 10 | Gowal et al. [24]                  | 90.9          | 74.5        | 82.70     | WRN70-16    |
| 11 | Schwag et al. [53]                  | 89.76         | 74.41            | 82.09     | Res18       | 12 | Wu et al. [67]                     | 88.51         | 73.66       | 81.09     | WRN34-10    |
| 13 | Augustin et al. [7]                 | 91.08         | 72.91            | 82.00     | Res50       | 14 | Engstrom et al. [22]               | 90.83         | 69.24       | 80.04     | Res50       |
| 15 | Rice et al. [49]                    | 88.67         | 67.68            | 78.18     | PreActRes18 | 16 | Rony et al. [50]                   | 89.05         | 66.44       | 77.75     | WRN28-10    |
| 17 | Ding et al. [19]                    | 88.02         | 66.09            | 77.06     | WRN28-4     |    |                                    |               |             |           |             |
| 18 | Bit Reduction [70]                  | 92.66         | 3.8              | 48.23     | WRN28-10    | 19 | Jpeg [21]                          | 83.9          | 69.85       | 76.88     | WRN28-10    |
| 20 | Input Rand. [69]                    | 94.3          | 25.71            | 60.01     | WRN28-10    | 21 | LIIF [13]                          | 94.85         | 0.22        | 47.54     | WRN28-10    |
| 22 | AutoEncoder                         | 76.54         | 71.71            | 74.13     | WRN28-10    | 23 | STL [60] (k=64 s=8 $\lambda=0.1$ ) | 90.65         | 75.55       | 83.1      | WRN28-10    |
| 24 | STL [60] (k=64 s=8 $\lambda=0.15$ ) | 86.77         | 76.45            | 81.61     | WRN28-10    | 25 | STL [60] (k=64 s=8 $\lambda=0.2$ ) | 82.22         | 74.33       | 78.28     | WRN28-10    |
| 26 | Median Filter                       | 79.67         | 63.94            | 71.81     | WRN28-10    |    |                                    |               |             |           |             |
| 27 | DISCO                               | 89.26         | 88.47 $\pm$ 0.16 | 88.87     | WRN28-10    |    |                                    |               |             |           |             |

Table B: Cifar10 baselines and DISCO under Autoattack ( $\epsilon_2 = 0.5$ ).

| ID | Method                              | Standard Acc. | Robust Acc.      | Avg. Acc. | Model       | ID | Method                             | Standard Acc. | Robust Acc.      | Avg. Acc. | Model       |
|----|-------------------------------------|---------------|------------------|-----------|-------------|----|------------------------------------|---------------|------------------|-----------|-------------|
| 0  | No Defense                          | 80.37         | 0                | 41.78     | WRN28-10    |    |                                    |               |                  |           |             |
| 1  | Gowal et al. [24]                   | 69.15         | 36.88            | 53.02     | WRN70-16    | 2  | Rebuffi et al. [48]                | 63.56         | 34.64            | 49.1      | WRN70-16    |
| 3  | Pang et al. [41]                    | 65.56         | 33.05            | 49.31     | WRN70-16    | 4  | Rebuffi et al. [48]                | 62.41         | 32.06            | 47.24     | WRN28-10    |
| 5  | Schwag et al. [53]                  | 65.93         | 31.15            | 48.54     | WRN34-10    | 6  | Pang et al. [41]                   | 63.66         | 31.08            | 47.37     | WRN28-10    |
| 7  | Chen et al. [10]                    | 64.07         | 30.59            | 47.33     | WRN34-10    | 8  | Addepalli et al. [2]               | 65.73         | 30.35            | 48.04     | WRN34-10    |
| 9  | Cui et al. [17]                     | 62.55         | 30.2             | 46.38     | WRN34-20    | 10 | Gowal et al. [24]                  | 60.86         | 30.03            | 45.45     | WRN70-16    |
| 11 | Cui et al. [17]                     | 60.64         | 29.33            | 44.99     | WRN34-10    | 12 | Rade et al. [47]                   | 61.5          | 28.88            | 45.19     | PreActRes18 |
| 13 | Wu et al. [67]                      | 60.38         | 28.86            | 44.62     | WRN34-10    | 14 | Rebuffi et al. [48]                | 56.87         | 28.5             | 42.69     | PreActRes18 |
| 15 | Dan et al. [26]                     | 59.23         | 28.42            | 43.83     | WRN28-10    | 16 | Cui et al. [17]                    | 70.25         | 27.16            | 48.71     | WRN34-10    |
| 17 | Addepalli et al. [2]                | 62.02         | 27.14            | 44.58     | PreActRes18 | 18 | Chen et al. [11]                   | 62.15         | 26.94            | 44.55     | WRN34-10    |
| 19 | Chawin et al. [58]                  | 62.82         | 24.57            | 43.7      | WRN34-10    | 20 | Rice et al. [49]                   | 53.83         | 18.95            | 36.39     | PreActRes18 |
| 21 | Bit Reduction [70]                  | 76.86         | 3.78             | 40.32     | WRN28-10    | 22 | Jpeg [21]                          | 61.89         | 39.59            | 50.74     | WRN28-10    |
| 23 | Input Rand. [69]                    | 73.57         | 3.31             | 38.44     | WRN28-10    | 24 | LIIF [13]                          | 80.3          | 3.36             | 41.83     | WRN28-10    |
| 25 | AutoEncoder                         | 58.79         | 48.36            | 53.575    | WRN28-10    | 26 | STL [60] (k=64 s=8 $\lambda=0.1$ ) | 74.28         | 30.05            | 52.17     | WRN28-10    |
| 27 | STL [60] (k=64 s=8 $\lambda=0.15$ ) | 70.3          | 41.82            | 56.06     | WRN28-10    | 28 | STL [60] (k=64 s=8 $\lambda=0.2$ ) | 67.41         | 46.07            | 56.74     | WRN28-10    |
| 29 | Median Filter                       | 65.78         | 34.52            | 50.15     | WRN28-10    |    |                                    |               |                  |           |             |
| 30 | DISCO                               | 72.07         | 67.93 $\pm$ 0.17 | 70        | WRN28-10    | 31 | DISCO                              | 71.62         | 69.01 $\pm$ 0.19 | 70.32     | WRN34-10    |

Table C: Cifar100 baselines and DISCO under Autoattack ( $\epsilon_\infty = 8/255$ ). This table corresponds to Fig. 6(b) in the main paper.

| ID | Method                             | Standard Acc. | Robust Acc.      | Avg. Acc. | Model   | ID | Method                             | Standard Acc. | Robust Acc.     | Avg. Acc. | Model   |
|----|------------------------------------|---------------|------------------|-----------|---------|----|------------------------------------|---------------|-----------------|-----------|---------|
| 0  | No Defense                         | 76.52         | 0                | 38.26     | Res50   |    |                                    |               |                 |           |         |
| 1  | Hadi et al. [51]                   | 68.46         | 38.14            | 53.3      | WRN50-2 | 2  | Hadi et al. [51]                   | 64.02         | 34.96           | 49.49     | Res50   |
| 3  | Engstrom et al. [22]               | 62.56         | 29.22            | 45.89     | Res50   | 4  | Wong et al. [64]                   | 55.62         | 26.24           | 40.93     | Res50   |
| 5  | Hadi et al. [51]                   | 52.92         | 25.32            | 39.12     | Res18   |    |                                    |               |                 |           |         |
| 6  | Bit Reduction [70]                 | 67.64         | 4.04             | 35.84     | Res18   | 7  | Bit Reduction [70]                 | 73.82         | 1.86            | 37.84     | Res50   |
| 8  | Bit Reduction [70]                 | 75.06         | 4.96             | 40.01     | WRN50-2 | 9  | Jpeg [21]                          | 67.18         | 13.08           | 40.13     | Res18   |
| 10 | Jpeg [21]                          | 73.64         | 33.42            | 53.53     | Res50   | 11 | Jpeg [21]                          | 75.42         | 24.9            | 50.16     | WRN50-2 |
| 12 | Input Rand. [69]                   | 64            | 17.78            | 40.89     | Res18   | 13 | Input Rand. [69]                   | 74.02         | 18.84           | 46.43     | Res50   |
| 14 | Input Rand. [69]                   | 71.7          | 23.58            | 47.64     | WRN50-2 | 15 | STL [60] (k=64 s=8 $\lambda=0.1$ ) | 67.5          | 18.5            | 43        | Res18   |
| 16 | STL [60] (k=64 s=8 $\lambda=0.2$ ) | 65.64         | 32.9             | 49.27     | Res18   | 17 | STL [60] (k=64 s=8 $\lambda=0.1$ ) | 72.56         | 32.7            | 52.63     | Res50   |
| 18 | STL [60] (k=64 s=8 $\lambda=0.2$ ) | 68.3          | 50.16            | 59.23     | Res50   | 19 | Median Filter                      | 66.1          | 10.34           | 38.22     | Res18   |
| 20 | Median Filter                      | 71.68         | 17.36            | 44.52     | Res50   |    |                                    |               |                 |           |         |
| 21 | DISCO                              | 67.98         | 60.88 $\pm$ 0.17 | 64.43     | Res18   | 22 | DISCO                              | 72.64         | 68.2 $\pm$ 0.29 | 70.42     | Res50   |
| 23 | DISCO                              | 75.1          | 69.5 $\pm$ 0.23  | 72.3      | WRN50-2 |    |                                    |               |                 |           |         |

Table D: ImageNet baselines and DISCO under Autoattack ( $\epsilon_\infty = 4/255$ ). This table corresponds to Fig. 6(c) in the main paper.

## 11 B Defense Transfer

12 In this section, the qualitative results of DISCO transferability across attacks are studied. Table E, F  
 13 and G represents the results for Cifar10, Cifar100 and ImageNet, respectively. The corresponding  
 14 plots are illustrated in Fig. A, B and C. More discussion can be found in Sec. 4.1 of the paper.

Table E: Defense Transfer across  $L_\infty$  attacks ( $\epsilon_\infty = 8/255$ ) on Cifar10.

| Method Classifier | Rebuffi et al. [48]<br>WRN70-16 | Gowal et al. [24]<br>WRN28-10 | DISCO<br>WRN28-10 |
|-------------------|---------------------------------|-------------------------------|-------------------|
| FGSM [23]         | <b>75.66</b>                    | 70.91                         | 64.08             |
| PGD [37]          | 69.93                           | 66.02                         | <b>82.99</b>      |
| BIM [34]          | 69.84                           | 65.95                         | <b>80.46</b>      |
| RFGSM [61]        | 69.8                            | 65.95                         | <b>81.2</b>       |
| EotPgd [35]       | 70.68                           | 66.58                         | <b>76.84</b>      |
| TPgd [74]         | <b>82.32</b>                    | 80.48                         | 81.61             |
| FFgsm [65]        | <b>78.04</b>                    | 73.37                         | 70.1              |
| MiFgsm [20]       | <b>73.22</b>                    | 68.82                         | 45.49             |
| APgd [15]         | 69.46                           | 65.69                         | <b>85.79</b>      |
| Jitter [52]       | 70.15                           | 64.84                         | <b>80.49</b>      |
| Avg.              | 72.72                           | 68.69                         | <b>75.88</b>      |

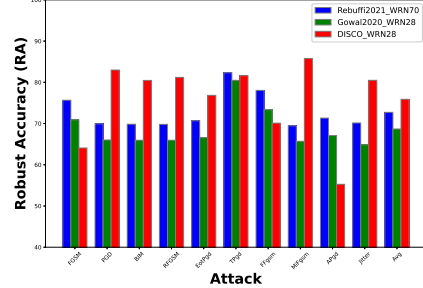

Figure A: Defense Transfer across  $L_\infty$  attacks on Cifar10.

Table F: Defense Transfer across  $L_\infty$  attacks ( $\epsilon_\infty = 8/255$ ) on Cifar100.

| Method Classifier | Gowal et al. [24]<br>WRN70-16 | Rebuffi et al. [48]<br>WRN28-10 | DISCO<br>WRN28-10 |
|-------------------|-------------------------------|---------------------------------|-------------------|
| FGSM [23]         | 44.53                         | 38.57                           | <b>50.4</b>       |
| PGD [37]          | 40.46                         | 36.09                           | <b>74.51</b>      |
| BIM [34]          | 40.38                         | 36.03                           | <b>72.25</b>      |
| RFGSM [61]        | 40.42                         | 35.99                           | <b>72.1</b>       |
| EotPgd [35]       | 41.07                         | 36.45                           | <b>74.8</b>       |
| TPgd [74]         | 57.52                         | 52.01                           | <b>74.06</b>      |
| FFgsm [65]        | 47.61                         | 41.47                           | <b>64.29</b>      |
| MiFgsm [20]       | 42.37                         | 37.31                           | <b>44.14</b>      |
| APgd [15]         | 39.99                         | 35.64                           | <b>77.33</b>      |
| Jitter [52]       | 38.38                         | 33.04                           | <b>73.75</b>      |
| Avg.              | 43.27                         | 38.26                           | <b>67.76</b>      |

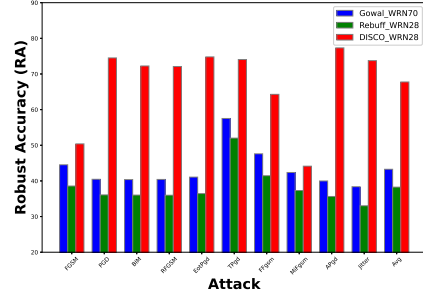

Figure B: Defense Transfer across  $L_\infty$  attacks on Cifar100.

Table G: Defense Transfer across  $L_\infty$  attacks ( $\epsilon_\infty = 4/255$ ) on ImageNet.

| Method Classifier | Hadi et al. [51]<br>Res50 | Engstrom et al. [22]<br>Res50 | DISCO<br>Res50 |
|-------------------|---------------------------|-------------------------------|----------------|
| Clean             | 64.1                      | 62.54                         | <b>72.64</b>   |
| FGSM [23]         | 43.48                     | 39.96                         | <b>55.72</b>   |
| PGD [37]          | 39.28                     | 33.32                         | <b>66.32</b>   |
| BIM [34]          | 39.26                     | 33.2                          | <b>66.4</b>    |
| RFGSM [61]        | 39.28                     | 33.16                         | <b>66.4</b>    |
| EotPgd [35]       | 41.2                      | 37.24                         | <b>69.32</b>   |
| TPgd [74]         | 53.82                     | 49.64                         | <b>69.94</b>   |
| FFgsm [65]        | 43.58                     | 40.1                          | <b>57</b>      |
| MiFgsm [20]       | 40.56                     | 35.6                          | <b>52.38</b>   |
| APgd [15]         | 38.42                     | 32.22                         | <b>68.3</b>    |
| Jitter [52]       | 36.26                     | 31.36                         | <b>67.04</b>   |
| Avg.              | 41.51                     | 36.58                         | <b>63.88</b>   |

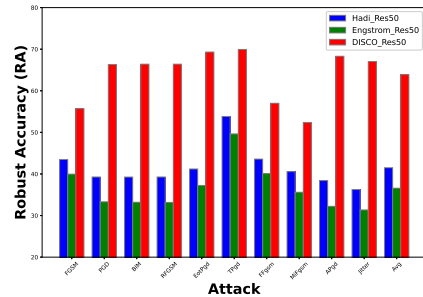

Figure C: Defense Transfer across  $L_\infty$  attacks on ImageNet.

## 15 C Improving Cifar10 and Cifar100 SOTA on RobustBench

16 Sec. 4.1 in the main paper shows that DISCO can improve the prior SOTA defenses on ImageNet  
 17 dataset. In Table H, we further investigate the gain of applying DISCO on SOTA Cifar10 and Cifar100  
 18 defense. The first and second block of Table H shows the gain after applying DISCO on [48], which

Table H: Improving SOTA defenses on RobustBench [14] for Cifar10 ( $L_2$  and  $L_\infty$ ) and Cifar100 ( $L_\infty$ ) dataset.

| Method              | Dataset  | Norm       | SA           | RA           | Avg.         |
|---------------------|----------|------------|--------------|--------------|--------------|
| Rebuffi et al. [48] | Cifar10  | $L_\infty$ | <b>92.23</b> | 66.58        | 79.41        |
| w/ DISCO            | Cifar10  | $L_\infty$ | 91.95        | <b>70.71</b> | <b>81.33</b> |
| Rebuffi et al. [48] | Cifar10  | $L_2$      | <b>95.74</b> | 82.32        | 89.03        |
| w/ DISCO            | Cifar10  | $L_2$      | 95.24        | <b>84.15</b> | <b>89.7</b>  |
| Gowal et al. [24]   | Cifar100 | $L_\infty$ | <b>69.15</b> | 36.88        | 53.02        |
| w/ DISCO            | Cifar10  | $L_\infty$ | 68.56        | <b>39.77</b> | <b>54.17</b> |

19 is the prior SOTA defense on Cifar10 against  $L_2$  and  $L_\infty$  Autoattack. DISCO also improves the  
 20 prior SOTA defense [24] on Cifar100 by 2.89%. These results indicate that DISCO can not only be a  
 21 robust defense by itself, but also applicable to other existing defense to improve their robustness.

## 22 D Kernel Size $s$

Table I: Ablation on various kernel size  $s$ .

| $s$ | SA           | RA           | Avg.         |
|-----|--------------|--------------|--------------|
| 1   | 71.22        | <b>69.52</b> | 70.37        |
| 3   | 72.64        | 68.2         | <b>70.42</b> |
| 5   | <b>74.22</b> | 60.1         | 67.16        |

23 In this section, we ablate the kernel size used to train DISCO on ImageNet. The kernel size  $s$   
 24 controls the feature neighborhood forwarded to the local implicit module. Table I shows that  $s = 3$   
 25 achieves the best performance, which degrades for  $s = 5$  by a significant margin (3.26%). This  
 26 shows that while tasks like classification require large and global receptive fields, the projection of  
 27 adversarial images into the natural image manifold can be done on small neighborhoods. Given that  
 28 the complexity of modeling the manifold increases with the neighborhood size, it is not surprising  
 29 that larger  $s$  lead to weaker performance. This is consistent with the well known complexity of  
 30 synthesizing images with global models, such as GANs. What is somewhat surprising is that even  
 31  $s = 1$  is sufficient to enable a robust defense. By default, we use  $s = 3$  in all our experiments.

## 32 E Computation Time for STL and DISCO

Table J: The computation time between STL [60] and DISCO when consuming different input size. Note that the STL requires  $36.34\times$  inference time when the image size increases from 32 to 224.

| Dataset       | Image Size | STL [60]       | DISCO         |               |               |               |               |
|---------------|------------|----------------|---------------|---------------|---------------|---------------|---------------|
|               |            |                | (K=1)         | (K=2)         | (K=3)         | (K=4)         | (K=5)         |
| Cifar10       | 32         | 0.65           | 0.011         | 0.021         | 0.031         | 0.037         | 0.048         |
| ImageNet      | 224        | 23.71          | 0.027         | 0.081         | 0.134         | 0.191         | 0.251         |
| Time Increase |            | $\times 36.34$ | $\times 2.41$ | $\times 3.86$ | $\times 4.35$ | $\times 5.14$ | $\times 5.19$ |

33 Table J compares the inference time of STL [60], DISCO and the cascade DISCO (from  $K = 2$   
 34 to 5) on Cifar10 and ImageNet. For a single image of size  $32\times 32$  in Cifar10 dataset, STL requires  
 35  $5.9\times$  (0.65 vs 0.011) inference time than DISCO ( $K=1$ ). When the cascade DISCO is used, the  
 36 computation time increases approximately in linear, as the  $K$  increases.

37 When a single image of size 224 in ImageNet dataset is considered, STL requires 23.71 second to  
 38 process the image, while DISCO ( $K=1$ ) only requires 0.027. The computation time difference on  
 39 ImageNet increases to  $878.15\times$  (23.71 vs 0.027), which is significantly larger than that of Cifar10  
 40 ( $5.9\times$ ). This indicates that DISCO is a better defense that suits for various input input size with minor  
 41 additional computing cost.

## 42 F Training Details

43 For Cifar10 and Cifar100, we train the DISCO for 40 epochs, while for ImageNet, DISCO is trained  
44 for 3 epochs since the images of ImageNet is larger and produce more random crops during training.  
45 The learning rate is set to 0.0001 and the Adam optimizer is used for all experiments. All the  
46 experiments are conducted using Pytorch [45]. All the time measurement of the baselines and DISCO  
47 are conducted on a single Nvidia Titan Xp GPU with Intel Xeon CPU E5-2630 with batch size 1 and  
48 averaged over 100 images.

## 49 G Adopted Code and Benchmark

50 In this section, we list the url links that are used for training and evaluating DISCO. To create the  
51 adversarial-clean training pairs, we adopt the code from TorchAttack<sup>2</sup> and Ares<sup>3</sup>, which support  
52 the multiple attack methods. These attack methods are then used to attack pretrained classifiers  
53 of Cifar10, Cifar100 and ImageNet. We adopt the ResNet18 classifiers of Cifar10 from Ares<sup>3</sup>,  
54 WideResNet classifiers of Cifar100 from this repository<sup>4</sup> and the ResNet18 classifiers of ImageNet  
55 from Pytorch [45].

56 To evaluate DISCO, we adopt the Autoattack from RobustBench [14]<sup>5</sup> and compare to the pretrained  
57 defenses on RobustBench leaderboard. In addition to Autoattack, we use AdverTorch<sup>6</sup> library to  
58 implement the BPDA [5] attack and TorchAttack<sup>7</sup> library for other attacks, like FGSM [23] and  
59 BIM [34].

60 For the adversarially trained defense baselines, we adopt the pretrained weights from Robust-  
61 Bench [14]<sup>8</sup>, while the code of transformation based baselines are adopted from Ares<sup>3</sup>, Cifar  
62 autoencoder<sup>9</sup> and STL<sup>1</sup> [60]. For DISCO implementation, we adopt the code from LIIF<sup>10</sup> [13].

## 63 H DCT Analysis

64 The effectiveness of perturbation removal can be analyzed in the frequency domain using Discrete  
65 Cosine Transform (DCT). Given an input image  $x$ , the corresponding clean image can be denoted  
66 as  $x_{cln}$ . The normalized difference (ND) after DCT over  $M$  input images and its associated clean  
67 images  $\mathcal{X}_{cln} = \{x_{cln}^i\}_{i=1}^M$  can be defined as

$$ND(\mathcal{X}) = \log\left(\frac{1}{M} \sum_{i=1}^M \left| \frac{DCT(x^i) - DCT(x_{cln}^i)}{DCT(x_{cln}^i)} \right| \right), \quad (1)$$

68 where  $\mathcal{X}$  can be an adversarial images  $\mathcal{X}_{Adv}$ , the outputs of defense model  $\mathcal{X}_{Def}$  or the outputs of  
69 cascade defense model  $\mathcal{X}_{CDef}$ . Fig. D(a), (b) and (c) are the ND results of  $\mathcal{X}_{Adv}$ ,  $\mathcal{X}_{Def}$  and  $\mathcal{X}_{CDef}$   
70 over 100 images ( $M = 100$ ). Darker area indicates that there exists higher similarity between the  
71 clean images and input images at specific frequency. Take Fig. D(a) for example. The dark area  
72 concentrates at low frequency area (upper left corner), while the bright area on the lower right corner  
73 shows that the adversarial noise are mostly high frequency. After the adversarial image is forwarded  
74 through DISCO, Fig. D(b) shows the high frequency area becomes darker. Fig. D(d) further highlights  
75 the difference between Fig. D(a) and (b) by illustrating  $\mathcal{U}(ND(\mathcal{X}_{Adv}) - ND(\mathcal{X}_{Def}))$ , where  $\mathcal{U}$  is a  
76 unit step function. The white area in Fig. D(d) indicates that most of the high frequency perturbation  
77 are removed from the adversarial images. Similarly, Fig. D(e) demonstrates that the cascade DISCO  
78 further removes the high frequency perturbation when comparing Fig. D(b) and (c).

<sup>2</sup><https://adversarial-attacks-pytorch.readthedocs.io/en/latest/>

<sup>3</sup><https://github.com/thu-ml/ares>

<sup>4</sup><https://github.com/xternalz/WideResNet-pytorch>

<sup>5</sup><https://github.com/RobustBench/robustbench>

<sup>6</sup><https://github.com/BorealisAI/advertorch>

<sup>7</sup><https://adversarial-attacks-pytorch.readthedocs.io/en/latest/>

<sup>8</sup><https://github.com/RobustBench/robustbench>

<sup>9</sup><https://github.com/chenjie/PyTorch-CIFAR-10-autoencoder>

<sup>10</sup><https://github.com/yinboc/liif>

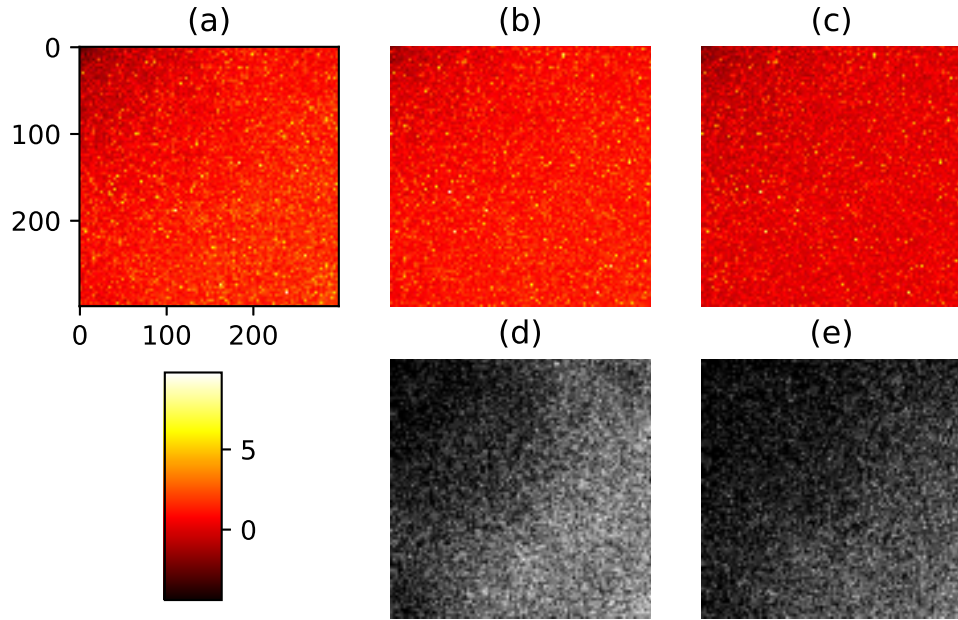

Figure D: (a), (b) and (c) are the ND results of  $\mathcal{X}_{Adv}$ ,  $\mathcal{X}_{Def}$  and  $\mathcal{X}_{CDef}$ . (d) and (e) highlights the difference between (a)/(b) and (b)/(c). See text for more details.

## 79 I Visualizations

80 The disco defense outputs against FGSM [23], BIM [34] and PGD [37] attacks are visualized in  
 81 Fig. E, F and G, respectively. Take Fig. E for example. The first and second row shows the clean  
 82 and adversarial images. For 3-5 rows of Fig. E, the output of DISCO and cascade DISCO ( $K = 2$   
 83 and  $K = 3$ ) are shown. Clearly, both DISCO and its cascade version can effectively remove the  
 84 adversarial perturbation. In addition, Fig. H shows the DISCO output of various size from  $128 \times 128$   
 85 to  $512 \times 512$ . Note that these images are produced from the same DISCO model without retraining for  
 86 any output size or attack.

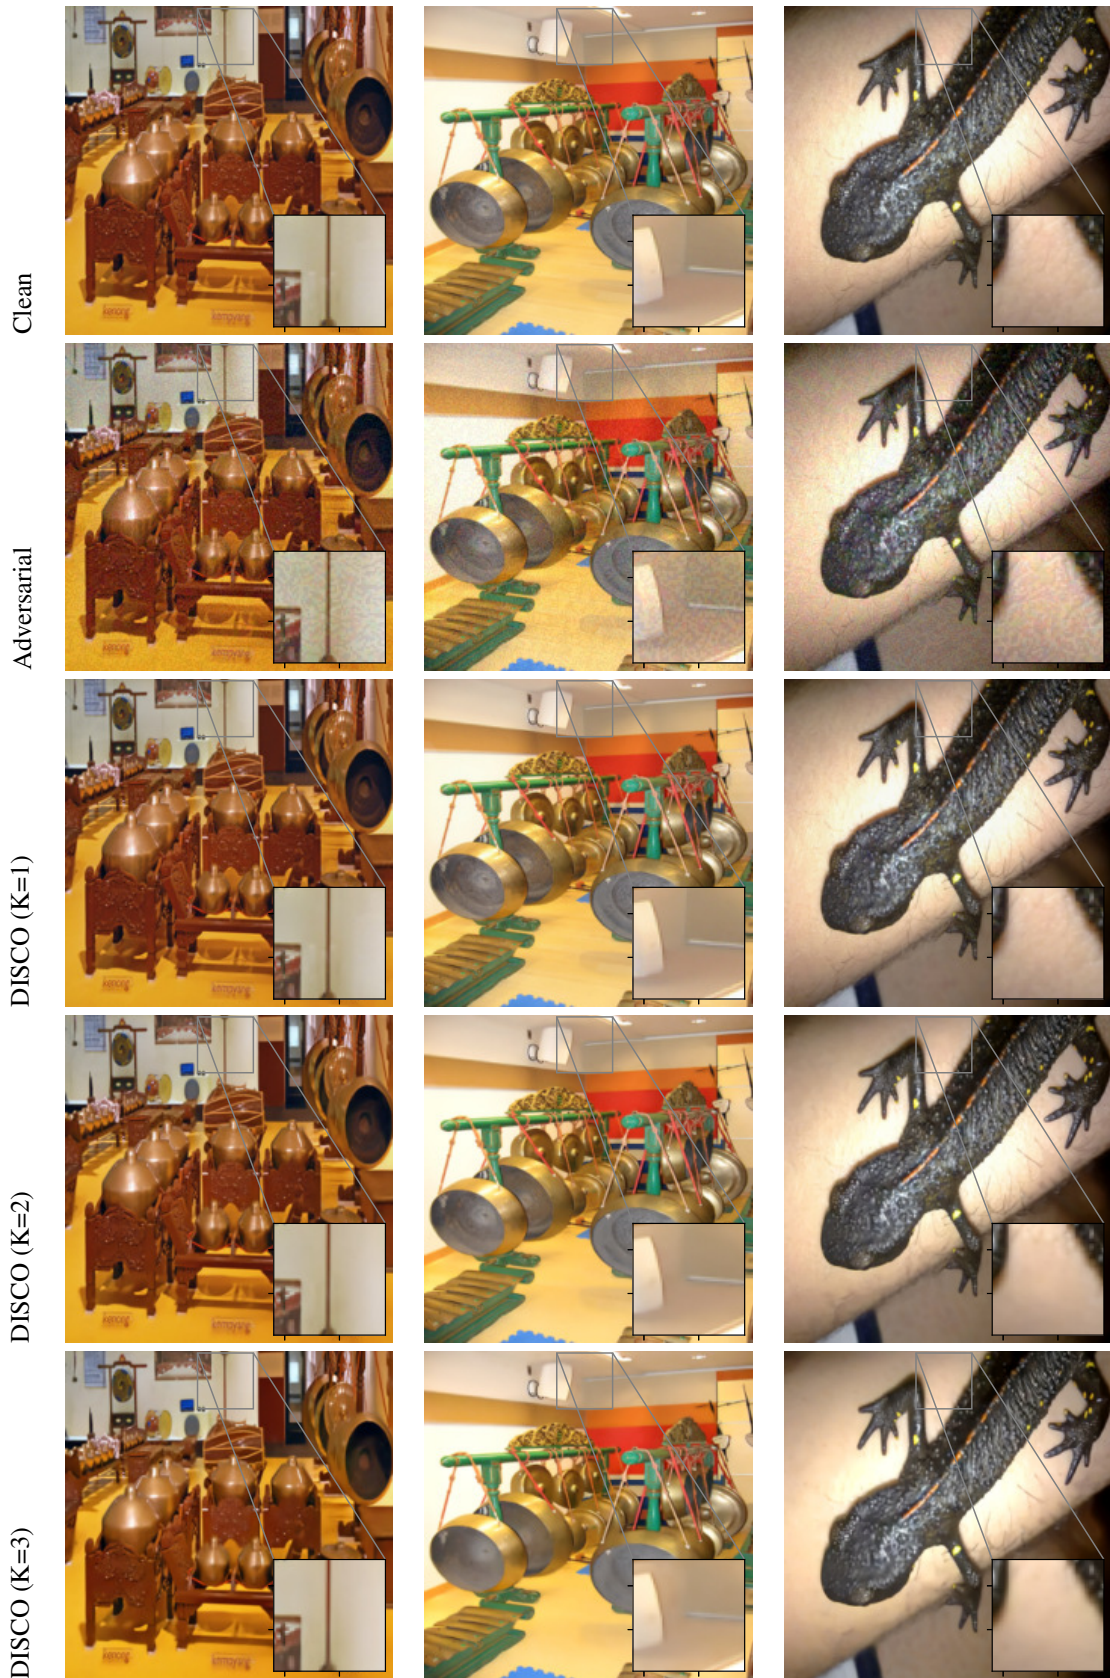

Figure E: Comparison of Clean image, Adversarial image and DISCO output from  $K = 1$  to 3 under FGSM attack.

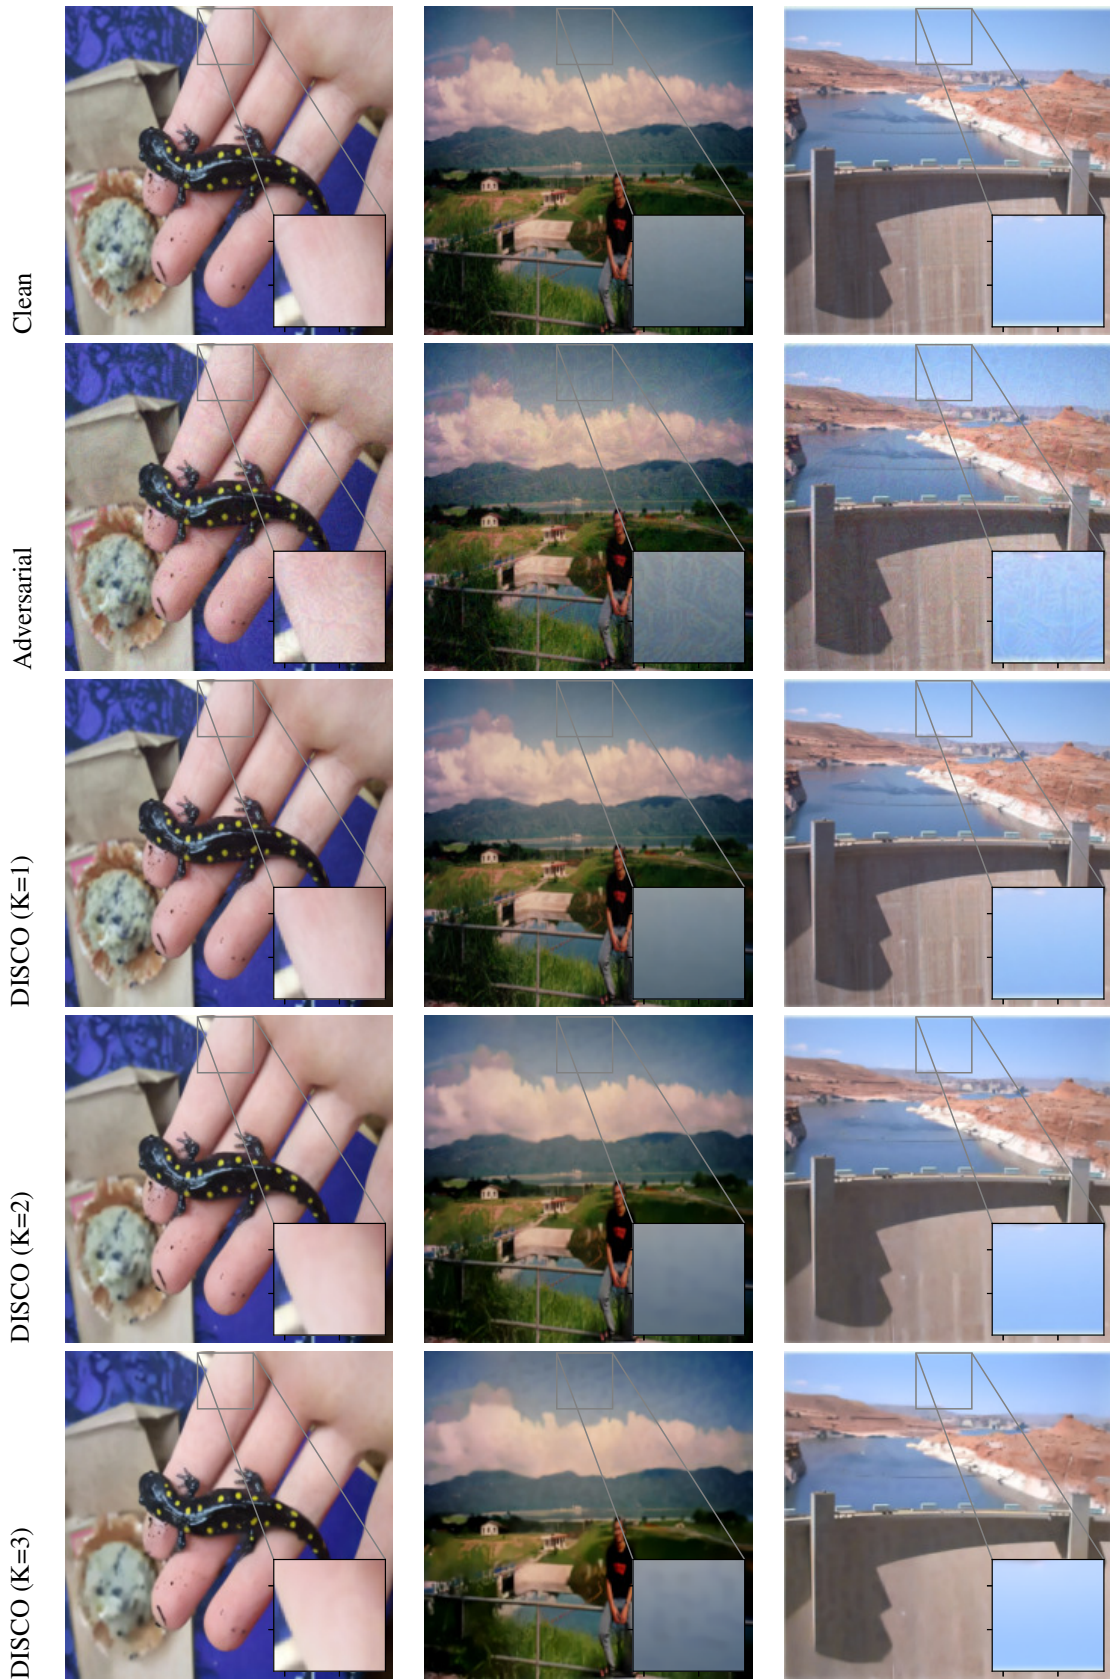

Figure F: Comparison of Clean image, Adversarial image and DISCO output from  $K = 1$  to 3 under BIM attack.

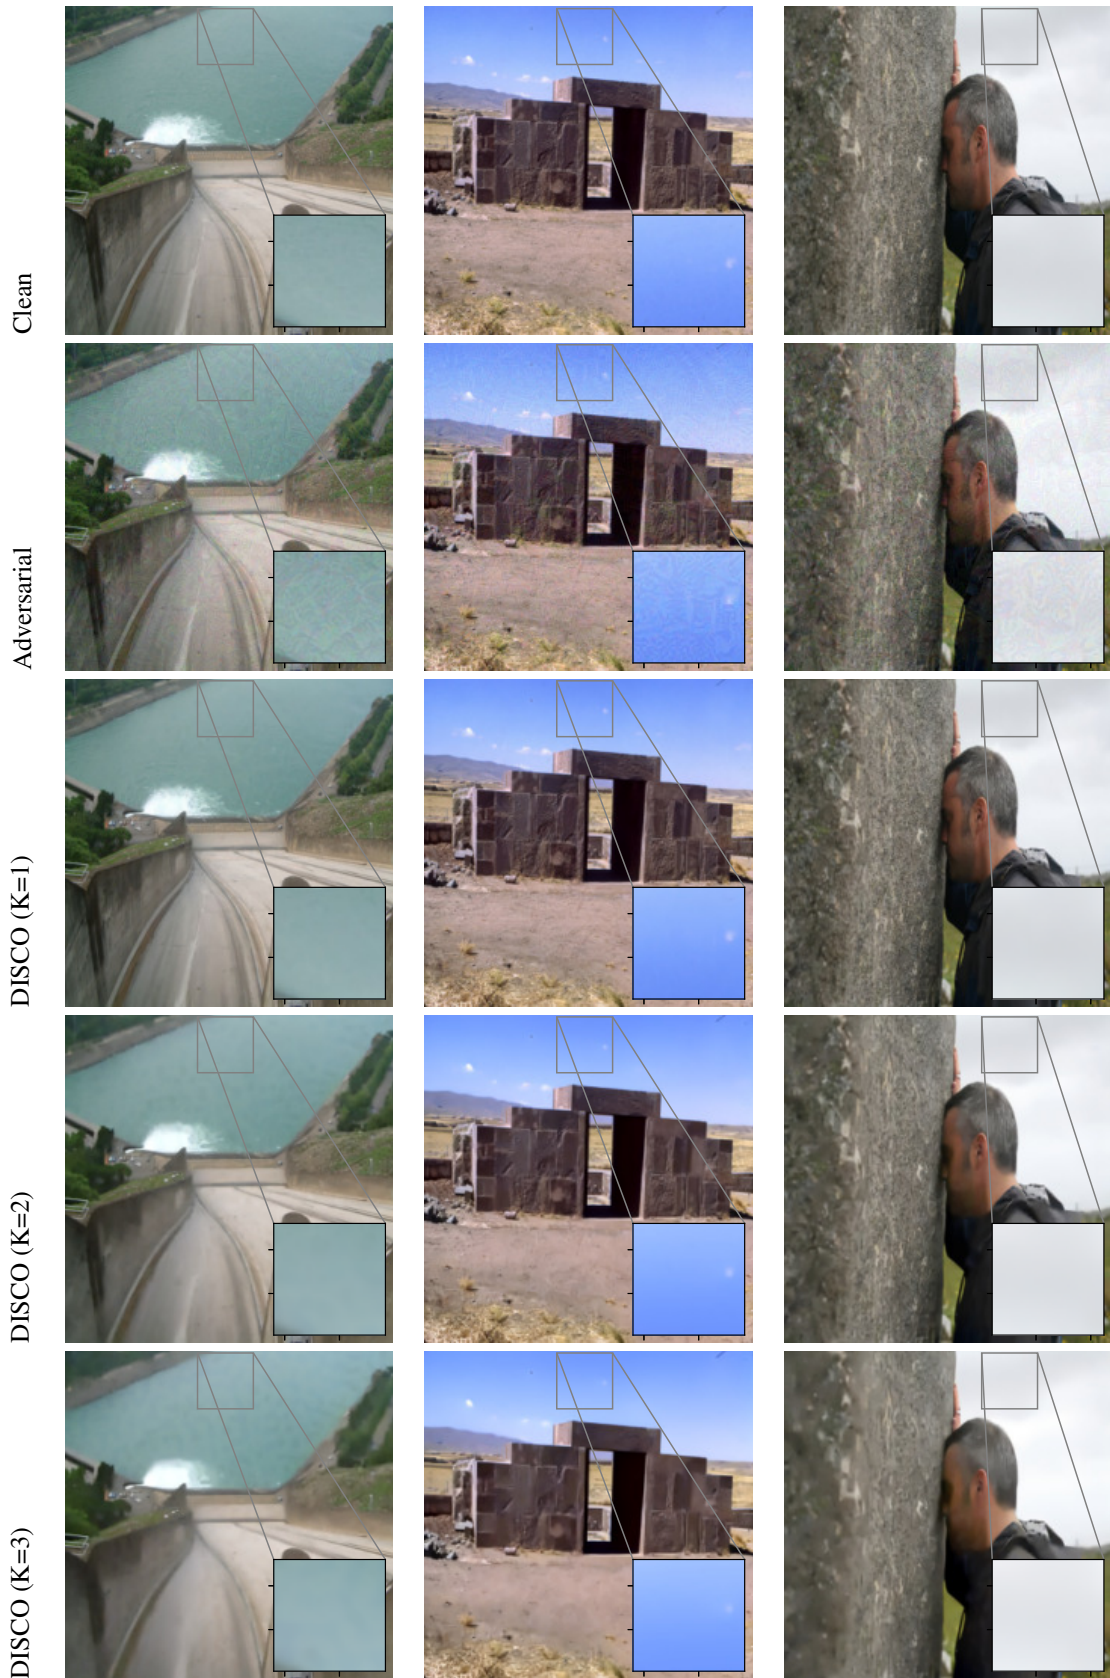

Figure G: Comparison of Clean image, Adversarial image and DISCO output from  $K = 1$  to 3 under PGD attack.

Size: 128

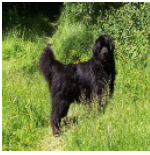

Size: 256

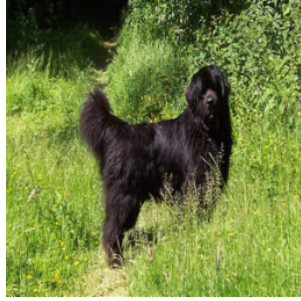

Size: 512

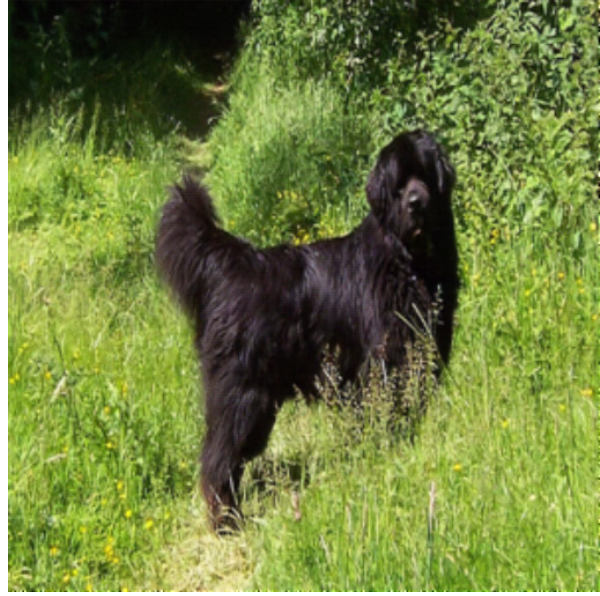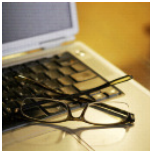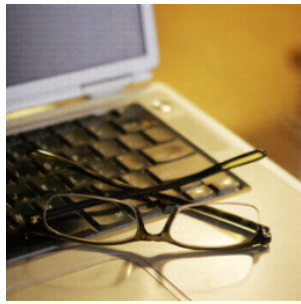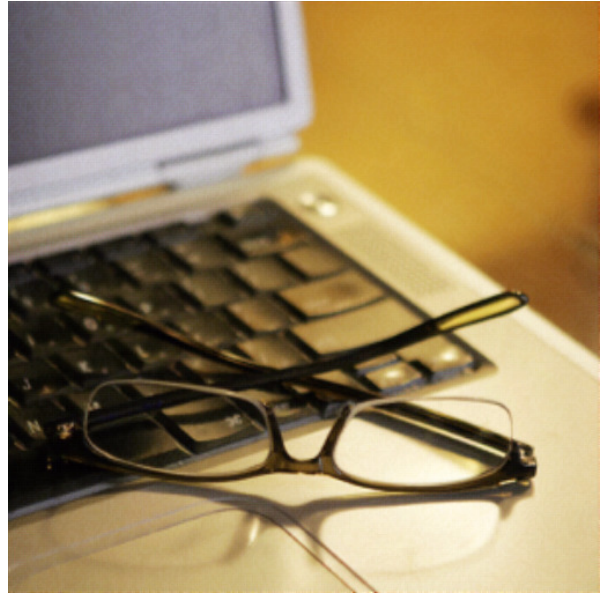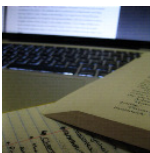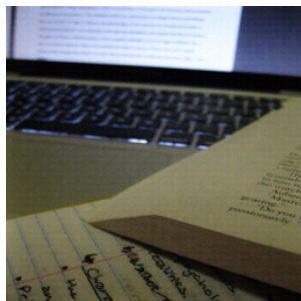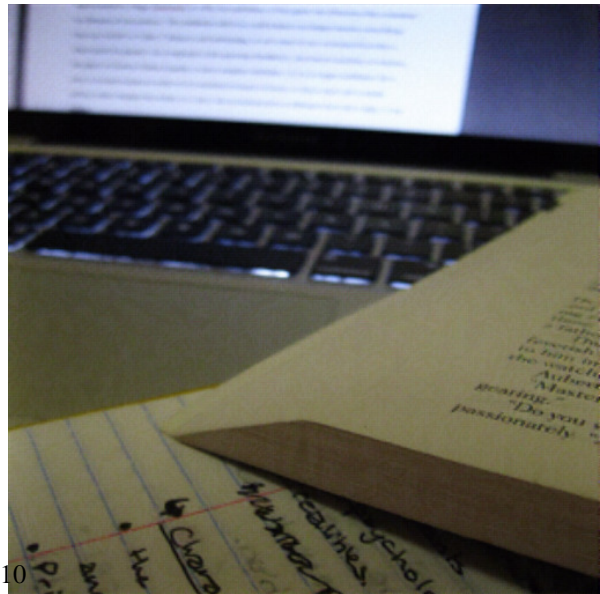

Figure H: Multiple output sizes (128, 256 and 512) of DISCO without re-training.

87 **Checklist**

- 88 1. For all authors...
- 89 (a) Do the main claims made in the abstract and introduction accurately reflect the paper's  
90 contributions and scope? [Yes]
- 91 (b) Did you describe the limitations of your work? [Yes]
- 92 (c) Did you discuss any potential negative societal impacts of your work? [Yes]
- 93 (d) Have you read the ethics review guidelines and ensured that your paper conforms to  
94 them? [Yes]
- 95 2. If you are including theoretical results...
- 96 (a) Did you state the full set of assumptions of all theoretical results? [N/A]
- 97 (b) Did you include complete proofs of all theoretical results? [N/A]
- 98 3. If you ran experiments...
- 99 (a) Did you include the code, data, and instructions needed to reproduce the main experi-  
100 mental results (either in the supplemental material or as a URL)? [Yes] The code will  
101 be released upon acceptance.
- 102 (b) Did you specify all the training details (e.g., data splits, hyperparameters, how they  
103 were chosen)? [Yes]
- 104 (c) Did you report error bars (e.g., with respect to the random seed after running experi-  
105 ments multiple times)? [Yes]
- 106 (d) Did you include the total amount of compute and the type of resources used (e.g., type  
107 of GPUs, internal cluster, or cloud provider)? [Yes]
- 108 4. If you are using existing assets (e.g., code, data, models) or curating/releasing new assets...
- 109 (a) If your work uses existing assets, did you cite the creators? [Yes]
- 110 (b) Did you mention the license of the assets? [N/A]
- 111 (c) Did you include any new assets either in the supplemental material or as a URL? [N/A]  
112
- 113 (d) Did you discuss whether and how consent was obtained from people whose data you're  
114 using/curating? [N/A]
- 115 (e) Did you discuss whether the data you are using/curating contains personally identifiable  
116 information or offensive content? [N/A]
- 117 5. If you used crowdsourcing or conducted research with human subjects...
- 118 (a) Did you include the full text of instructions given to participants and screenshots, if  
119 applicable? [N/A]
- 120 (b) Did you describe any potential participant risks, with links to Institutional Review  
121 Board (IRB) approvals, if applicable? [N/A]
- 122 (c) Did you include the estimated hourly wage paid to participants and the total amount  
123 spent on participant compensation? [N/A]

## References

- [1] Sravanti Addepalli, Samyak Jain, Gaurang Sriramanan, Shivangi Khare, and Venkatesh Babu Radhakrishnan. Towards achieving adversarial robustness beyond perceptual limits. In *ICML 2021 Workshop on Adversarial Machine Learning*, 2021.
- [2] Sravanti Addepalli, Samyak Jain, Gaurang Sriramanan, Shivangi Khare, and Venkatesh Babu Radhakrishnan. Towards achieving adversarial robustness beyond perceptual limits. In *ICML 2021 Workshop on Adversarial Machine Learning*, 2021.
- [3] Jean-Baptiste Alayrac, Jonathan Uesato, Po-Sen Huang, Alhussein Fawzi, Robert Stanforth, and Pushmeet Kohli. Are labels required for improving adversarial robustness? In H. Wallach, H. Larochelle, A. Beygelzimer, F. d'Alché-Buc, E. Fox, and R. Garnett, editors, *Advances in Neural Information Processing Systems*, volume 32. Curran Associates, Inc., 2019.
- [4] Maksym Andriushchenko and Nicolas Flammarion. Understanding and improving fast adversarial training. In *NeurIPS*, 2020.
- [5] Anish Athalye, Nicholas Carlini, and David A. Wagner. Obfuscated gradients give a false sense of security: Circumventing defenses to adversarial examples. In *ICML*, pages 274–283, 2018.
- [6] Matan Atzmon, Niv Haim, Lior Yariv, Ofer Israelov, Haggai Maron, and Yaron Lipman. Controlling neural level sets. In *Advances in Neural Information Processing Systems*, pages 2032–2041, 2019.
- [7] Maximilian Augustin, Alexander Meinke, and Matthias Hein. Adversarial robustness on in- and out-distribution improves explainability. In Andrea Vedaldi, Horst Bischof, Thomas Brox, and Jan-Michael Frahm, editors, *Computer Vision – ECCV 2020*, pages 228–245, Cham, 2020. Springer International Publishing.
- [8] Yair Carmon, Aditi Raghunathan, Ludwig Schmidt, John C Duchi, and Percy S Liang. Unlabeled data improves adversarial robustness. In H. Wallach, H. Larochelle, A. Beygelzimer, F. d'Alché-Buc, E. Fox, and R. Garnett, editors, *Advances in Neural Information Processing Systems*, volume 32. Curran Associates, Inc., 2019.
- [9] Alvin Chan, Yi Tay, Yew Soon Ong, and Jie Fu. Jacobian adversarially regularized networks for robustness. In *International Conference on Learning Representations*, 2020.
- [10] Erh-Chung Chen and Che-Rung Lee. Ltd: Low temperature distillation for robust adversarial training, 2021.
- [11] Jinghui Chen, Yu Cheng, Zhe Gan, Quanquan Gu, and Jingjing Liu. Efficient robust training via backward smoothing, 2021.
- [12] Tianlong Chen, Sijia Liu, Shiyu Chang, Yu Cheng, Lisa Amini, and Zhangyang Wang. Adversarial robustness: From self-supervised pre-training to fine-tuning. In *The IEEE/CVF Conference on Computer Vision and Pattern Recognition (CVPR)*, June 2020.
- [13] Yinbo Chen, Sifei Liu, and Xiaolong Wang. Learning continuous image representation with local implicit image function. In *Proceedings of the IEEE/CVF Conference on Computer Vision and Pattern Recognition*, pages 8628–8638, 2021.
- [14] Francesco Croce, Maksym Andriushchenko, Vikash Sehwal, Edoardo DeBenedetti, Nicolas Flammarion, Mung Chiang, Prateek Mittal, and Matthias Hein. RobustBench: a standardized adversarial robustness benchmark. In *Thirty-fifth Conference on Neural Information Processing Systems Datasets and Benchmarks Track*, 2021.
- [15] Francesco Croce and Matthias Hein. Reliable evaluation of adversarial robustness with an ensemble of diverse parameter-free attacks. In *ICML*, 2020.
- [16] Jiequan Cui, Shu Liu, Liwei Wang, and Jiaya Jia. Learnable boundary guided adversarial training. *arXiv preprint arXiv:2011.11164*, 2020.

- 170 [17] Jiequan Cui, Shu Liu, Liwei Wang, and Jiaya Jia. Learnable boundary guided adversarial  
171 training. *2021 IEEE/CVF International Conference on Computer Vision (ICCV)*, pages 15701–  
172 15710, 2021.
- 173 [18] Sihui Dai, Saeed Mahloujifar, and Prateek Mittal. Parameterizing activation functions for  
174 adversarial robustness. *CoRR*, abs/2110.05626, 2021.
- 175 [19] Gavin Weiguang Ding, Yash Sharma, Kry Yik Chau Lui, and Ruitong Huang. Mma training: Di-  
176 rect input space margin maximization through adversarial training. In *International Conference*  
177 *on Learning Representations*, 2020.
- 178 [20] Yinpeng Dong, Fangzhou Liao, Tianyu Pang, Hang Su, Jun Zhu, Xiaolin Hu, and Jianguo Li.  
179 Boosting adversarial attacks with momentum. *2018 IEEE/CVF Conference on Computer Vision*  
180 *and Pattern Recognition*, pages 9185–9193, 2018.
- 181 [21] Gintare Karolina Dziugaite, Zoubin Ghahramani, and Daniel M. Roy. A study of the effect of  
182 jpg compression on adversarial images. *ArXiv*, abs/1608.00853, 2016.
- 183 [22] Logan Engstrom, Andrew Ilyas, Hadi Salman, Shibani Santurkar, and Dimitris Tsipras. Robust-  
184 ness (python library), 2019.
- 185 [23] Ian Goodfellow, Jonathon Shlens, and Christian Szegedy. Explaining and harnessing adversarial  
186 examples. In *International Conference on Learning Representations*, 2015.
- 187 [24] Sven Gowal, Chongli Qin, Jonathan Uesato, Timothy Mann, and Pushmeet Kohli. Uncovering  
188 the limits of adversarial training against norm-bounded adversarial examples. *arXiv preprint*  
189 *arXiv:2010.03593*, 2020.
- 190 [25] Sven Gowal, Sylvestre-Alvise Rebuffi, Olivia Wiles, Florian Stimberg, Dan Andrei Calian, and  
191 Timothy A Mann. Improving robustness using generated data. In M. Ranzato, A. Beygelzimer,  
192 Y. Dauphin, P.S. Liang, and J. Wortman Vaughan, editors, *Advances in Neural Information*  
193 *Processing Systems*, volume 34, pages 4218–4233. Curran Associates, Inc., 2021.
- 194 [26] Dan Hendrycks, Kimin Lee, and Mantas Mazeika. Using pre-training can improve model  
195 robustness and uncertainty. *Proceedings of the International Conference on Machine Learning*,  
196 2019.
- 197 [27] Hanxun Huang, Yisen Wang, Sarah Monazam Erfani, Quanquan Gu, James Bailey, and Xingjun  
198 Ma. Exploring architectural ingredients of adversarially robust deep neural networks. In  
199 *NeurIPS*, 2021.
- 200 [28] Lang Huang, Chao Zhang, and Hongyang Zhang. Self-adaptive training: beyond empirical risk  
201 minimization. In *Advances in Neural Information Processing Systems*, volume 33, 2020.
- 202 [29] Yunseok Jang, Tianchen Zhao, Seunghoon Hong, and Honglak Lee. Adversarial defense via  
203 learning to generate diverse attacks. In *2019 IEEE/CVF International Conference on Computer*  
204 *Vision (ICCV)*, pages 2740–2749, 2019.
- 205 [30] Charles Jin and Martin Rinard. Manifold regularization for locally stable deep neural networks,  
206 2021.
- 207 [31] QIYU KANG, Yang Song, Qinxu Ding, and Wee Peng Tay. Stable neural ODE with  
208 lyapunov-stable equilibrium points for defending against adversarial attacks. In A. Beygelz-  
209 imer, Y. Dauphin, P. Liang, and J. Wortman Vaughan, editors, *Advances in Neural Information*  
210 *Processing Systems*, 2021.
- 211 [32] Jungeum Kim and Xiao Wang. Sensible adversarial learning, 2020.
- 212 [33] Souvik Kundu, Mahdi Nazemi, Peter A. Beerel, and Massoud Pedram. Dnr: A tunable robust  
213 pruning framework through dynamic network rewiring of dnns. In *Proceedings of the 26th Asia*  
214 *and South Pacific Design Automation Conference, ASPDAC '21*, page 344–350, New York, NY,  
215 USA, 2021. Association for Computing Machinery.
- 216 [34] Alexey Kurakin, Ian Goodfellow, and Samy Bengio. Adversarial examples in the physical  
217 world. *ICLR Workshop*, 2017.

- 218 [35] Xuanqing Liu, Yao Li, Chongruo Wu, and Cho-Jui Hsieh. Adv-BNN: Improved adversarial  
219 defense through robust bayesian neural network. In *International Conference on Learning*  
220 *Representations*, 2019.
- 221 [36] Aleksander Madry, Aleksandar Makelov, Ludwig Schmidt, Dimitris Tsipras, and Adrian Vladu.  
222 Towards deep learning models resistant to adversarial attacks. In *International Conference on*  
223 *Learning Representations*, 2018.
- 224 [37] Aleksander Madry, Aleksandar Makelov, Ludwig Schmidt, Dimitris Tsipras, and Adrian Vladu.  
225 Towards deep learning models resistant to adversarial attacks. In *International Conference on*  
226 *Learning Representations*, 2018.
- 227 [38] Chengzhi Mao, Ziyuan Zhong, Junfeng Yang, Carl Vondrick, and Baishakhi Ray. Metric  
228 learning for adversarial robustness. In H. Wallach, H. Larochelle, A. Beygelzimer, F. d'Alché-  
229 Buc, E. Fox, and R. Garnett, editors, *Advances in Neural Information Processing Systems*,  
230 volume 32. Curran Associates, Inc., 2019.
- 231 [39] Seyed-Mohsen Moosavi-Dezfooli, Alhussein Fawzi, Jonathan Uesato, and Pascal Frossard.  
232 Robustness via curvature regularization, and vice versa. *2019 IEEE/CVF Conference on*  
233 *Computer Vision and Pattern Recognition (CVPR)*, pages 9070–9078, 2019.
- 234 [40] Aamir Mustafa, Salman Khan, Munawar Hayat, Roland Goecke, Jianbing Shen, and Ling Shao.  
235 Adversarial defense by restricting the hidden space of deep neural networks. In *The IEEE*  
236 *International Conference on Computer Vision (ICCV)*, October 2019.
- 237 [41] Tianyu Pang, Min Lin, Xiao Yang, Jun Zhu, and Shuicheng Yan. Robustness and accuracy  
238 could be reconcilable by (proper) definition, 2022.
- 239 [42] Tianyu Pang, Kun Xu, Yinpeng Dong, Chao Du, Ning Chen, and Jun Zhu. Rethinking  
240 softmax cross-entropy loss for adversarial robustness. In *International Conference on Learning*  
241 *Representations*, 2020.
- 242 [43] Tianyu Pang, Xiao Yang, Yinpeng Dong, Hang Su, and Jun Zhu. Bag of tricks for adversarial  
243 training. In *International Conference on Learning Representations*, 2021.
- 244 [44] Tianyu Pang, Xiao Yang, Yinpeng Dong, Kun Xu, Jun Zhu, and Hang Su. Boosting adversarial  
245 training with hypersphere embedding. In H. Larochelle, M. Ranzato, R. Hadsell, M.F. Balcan,  
246 and H. Lin, editors, *Advances in Neural Information Processing Systems*, volume 33, pages  
247 7779–7792. Curran Associates, Inc., 2020.
- 248 [45] Adam Paszke, Sam Gross, Francisco Massa, Adam Lerer, James Bradbury, Gregory Chanan,  
249 Trevor Killeen, Zeming Lin, Natalia Gimelshein, Luca Antiga, Alban Desmaison, Andreas  
250 Kopf, Edward Yang, Zachary DeVito, Martin Raison, Alykhan Tejani, Sasank Chilamkurthy,  
251 Benoit Steiner, Lu Fang, Junjie Bai, and Soumith Chintala. Pytorch: An imperative style, high-  
252 performance deep learning library. In H. Wallach, H. Larochelle, A. Beygelzimer, F. d'Alché-  
253 Buc, E. Fox, and R. Garnett, editors, *Advances in Neural Information Processing Systems 32*,  
254 pages 8024–8035. Curran Associates, Inc., 2019.
- 255 [46] Chongli Qin, James Martens, Sven Gowal, Dilip Krishnan, Krishnamurthy Dvijotham, Alhus-  
256 sein Fawzi, Soham De, Robert Stanforth, and Pushmeet Kohli. Adversarial robustness through  
257 local linearization. In *NeurIPS*, 2019.
- 258 [47] Rahul Rade and Seyed-Mohsen Moosavi-Dezfooli. Helper-based adversarial training: Reducing  
259 excessive margin to achieve a better accuracy vs. robustness trade-off. In *ICML 2021 Workshop*  
260 *on Adversarial Machine Learning*, 2021.
- 261 [48] Sylvestre-Alvise Rebuffi, Sven Gowal, Dan Andrei Calian, Florian Stimberg, Olivia Wiles,  
262 and Timothy A. Mann. Fixing data augmentation to improve adversarial robustness. *ArXiv*,  
263 abs/2103.01946, 2021.
- 264 [49] Leslie Rice, Eric Wong, and J. Zico Kolter. Overfitting in adversarially robust deep learning. In  
265 *ICML*, 2020.

- 266 [50] Jérôme Rony, Luiz G. Hafemann, Luiz Oliveira, Ismail Ben Ayed, Robert Sabourin, and Eric  
267 Granger. Decoupling direction and norm for efficient gradient-based l2 adversarial attacks and  
268 defenses. *2019 IEEE/CVF Conference on Computer Vision and Pattern Recognition (CVPR)*,  
269 pages 4317–4325, 2019.
- 270 [51] Hadi Salman, Andrew Ilyas, Logan Engstrom, Ashish Kapoor, and Aleksander Madry. Do  
271 adversarially robust imagenet models transfer better? In H. Larochelle, M. Ranzato, R. Had-  
272 sell, M.F. Balcan, and H. Lin, editors, *Advances in Neural Information Processing Systems*,  
273 volume 33, pages 3533–3545. Curran Associates, Inc., 2020.
- 274 [52] Leo Schwinn, René Raab, An Nguyen, Dario Zanca, and Bjoern M. Eskofier. Exploring robust  
275 misclassifications of neural networks to enhance adversarial attacks. 2021.
- 276 [53] Vikash Sehwal, Saeed Mahloujifar, Tinashe Handina, Sihui Dai, Chong Xiang, Mung Chiang,  
277 and Prateek Mittal. Robust learning meets generative models: Can proxy distributions improve  
278 adversarial robustness? In *International Conference on Learning Representations*, 2022.
- 279 [54] Vikash Sehwal, Saeed Mahloujifar, Tinashe Handina, Sihui Dai, Chong Xiang, Mung Chiang,  
280 and Prateek Mittal. Robust learning meets generative models: Can proxy distributions improve  
281 adversarial robustness? In *International Conference on Learning Representations*, 2022.
- 282 [55] Vikash Sehwal, Shiqi Wang, Prateek Mittal, and Suman Jana. Hydra: Pruning adversarially  
283 robust neural networks. *Advances in Neural Information Processing Systems*, 33, 2020.
- 284 [56] Ali Shafahi, Mahyar Najibi, Amin Ghiasi, Zheng Xu, John P. Dickerson, Christoph Studer,  
285 Larry S. Davis, Gavin Taylor, and Tom Goldstein. Adversarial training for free! In *NeurIPS*,  
286 2019.
- 287 [57] Abhishek Sinha, Mayank Kumar Singh, Nupur Kumari, Balaji Krishnamurthy, Harshitha  
288 Machiraju, and Vineeth N. Balasubramanian. Harnessing the vulnerability of latent layers in  
289 adversarially trained models. *ArXiv*, abs/1905.05186, 2019.
- 290 [58] Chawin Sitawarin, Supriyo Chakraborty, and David A. Wagner. Improving adversarial robust-  
291 ness through progressive hardening. *CoRR*, abs/2003.09347, 2020.
- 292 [59] Kaustubh Sridhar, Oleg Sokolsky, Insup Lee, and James Weimer. Robust learning via persistency  
293 of excitation. *ArXiv*, abs/2106.02078, 2021.
- 294 [60] Bo Sun, Nian hsuan Tsai, Fangchen Liu, Ronald Yu, and Hao Su. Adversarial defense by  
295 stratified convolutional sparse coding. *2019 IEEE/CVF Conference on Computer Vision and  
296 Pattern Recognition (CVPR)*, pages 11439–11448, 2019.
- 297 [61] Florian Tramèr, Alexey Kurakin, Nicolas Papernot, Ian Goodfellow, Dan Boneh, and Patrick  
298 McDaniel. Ensemble adversarial training: Attacks and defenses. In *International Conference  
299 on Learning Representations*, 2018.
- 300 [62] Jianyu Wang. Bilateral adversarial training: Towards fast training of more robust models against  
301 adversarial attacks. *2019 IEEE/CVF International Conference on Computer Vision (ICCV)*,  
302 pages 6628–6637, 2019.
- 303 [63] Yisen Wang, Difan Zou, Jinfeng Yi, James Bailey, Xingjun Ma, and Quanquan Gu. Improving  
304 adversarial robustness requires revisiting misclassified examples. In *International Conference  
305 on Learning Representations*, 2020.
- 306 [64] Eric Wong, Leslie Rice, and J. Zico Kolter. Fast is better than free: Revisiting adversarial  
307 training. In *International Conference on Learning Representations*, 2020.
- 308 [65] Eric Wong, Leslie Rice, and J. Zico Kolter. Fast is better than free: Revisiting adversarial  
309 training. In *International Conference on Learning Representations*, 2020.
- 310 [66] Boxi Wu, Jinghui Chen, Deng Cai, Xiaofei He, and Quanquan Gu. Do wider neural networks  
311 really help adversarial robustness? In A. Beygelzimer, Y. Dauphin, P. Liang, and J. Wortman  
312 Vaughan, editors, *Advances in Neural Information Processing Systems*, 2021.

- 313 [67] Dongxian Wu, Shu-Tao Xia, and Yisen Wang. Adversarial weight perturbation helps robust  
314 generalization. In *NeurIPS*, 2020.
- 315 [68] Chang Xiao, Peilin Zhong, and Changxi Zheng. Enhancing adversarial defense by k-winners-  
316 take-all. In *International Conference on Learning Representations*, 2020.
- 317 [69] Cihang Xie, Jianyu Wang, Zhishuai Zhang, Zhou Ren, and Alan Yuille. Mitigating adversarial  
318 effects through randomization. In *International Conference on Learning Representations*, 2018.
- 319 [70] Weilin Xu, David Evans, and Yanjun Qi. Feature squeezing: Detecting adversarial examples in  
320 deep neural networks. *ArXiv*, abs/1704.01155, 2018.
- 321 [71] Dinghui Zhang, Tianyuan Zhang, Yiping Lu, Zhanxing Zhu, and Bin Dong. *You Only*  
322 *Propagate Once: Accelerating Adversarial Training via Maximal Principle*. Curran Associates  
323 Inc., Red Hook, NY, USA, 2019.
- 324 [72] Haichao Zhang and Jianyu Wang. Defense against adversarial attacks using feature scattering-  
325 based adversarial training. In *Advances in Neural Information Processing Systems*, 2019.
- 326 [73] Haichao Zhang and Wei Xu. Adversarial interpolation training: A simple approach for improv-  
327 ing model robustness, 2020.
- 328 [74] Hongyang Zhang, Yaodong Yu, Jiantao Jiao, Eric P. Xing, Laurent El Ghaoui, and Michael I.  
329 Jordan. Theoretically principled trade-off between robustness and accuracy. In *International*  
330 *Conference on Machine Learning*, 2019.
- 331 [75] Huan Zhang, Hongge Chen, Chaowei Xiao, Sven Gowal, Robert Stanforth, Bo Li, Duane  
332 Boning, and Cho-Jui Hsieh. Towards stable and efficient training of verifiably robust neural  
333 networks. In *International Conference on Learning Representations*, 2020.
- 334 [76] Jingfeng Zhang, Xilie Xu, Bo Han, Gang Niu, Lizhen Cui, Masashi Sugiyama, and Mohan  
335 Kankanhalli. Attacks which do not kill training make adversarial learning stronger. In *ICML*,  
336 2020.
- 337 [77] Jingfeng Zhang, Jianing Zhu, Gang Niu, Bo Han, Masashi Sugiyama, and Mohan Kankanhalli.  
338 Geometry-aware instance-reweighted adversarial training. In *International Conference on*  
339 *Learning Representations*, 2021.
